# THE AMERICAN JOURNAL OF PSYCHIATRY

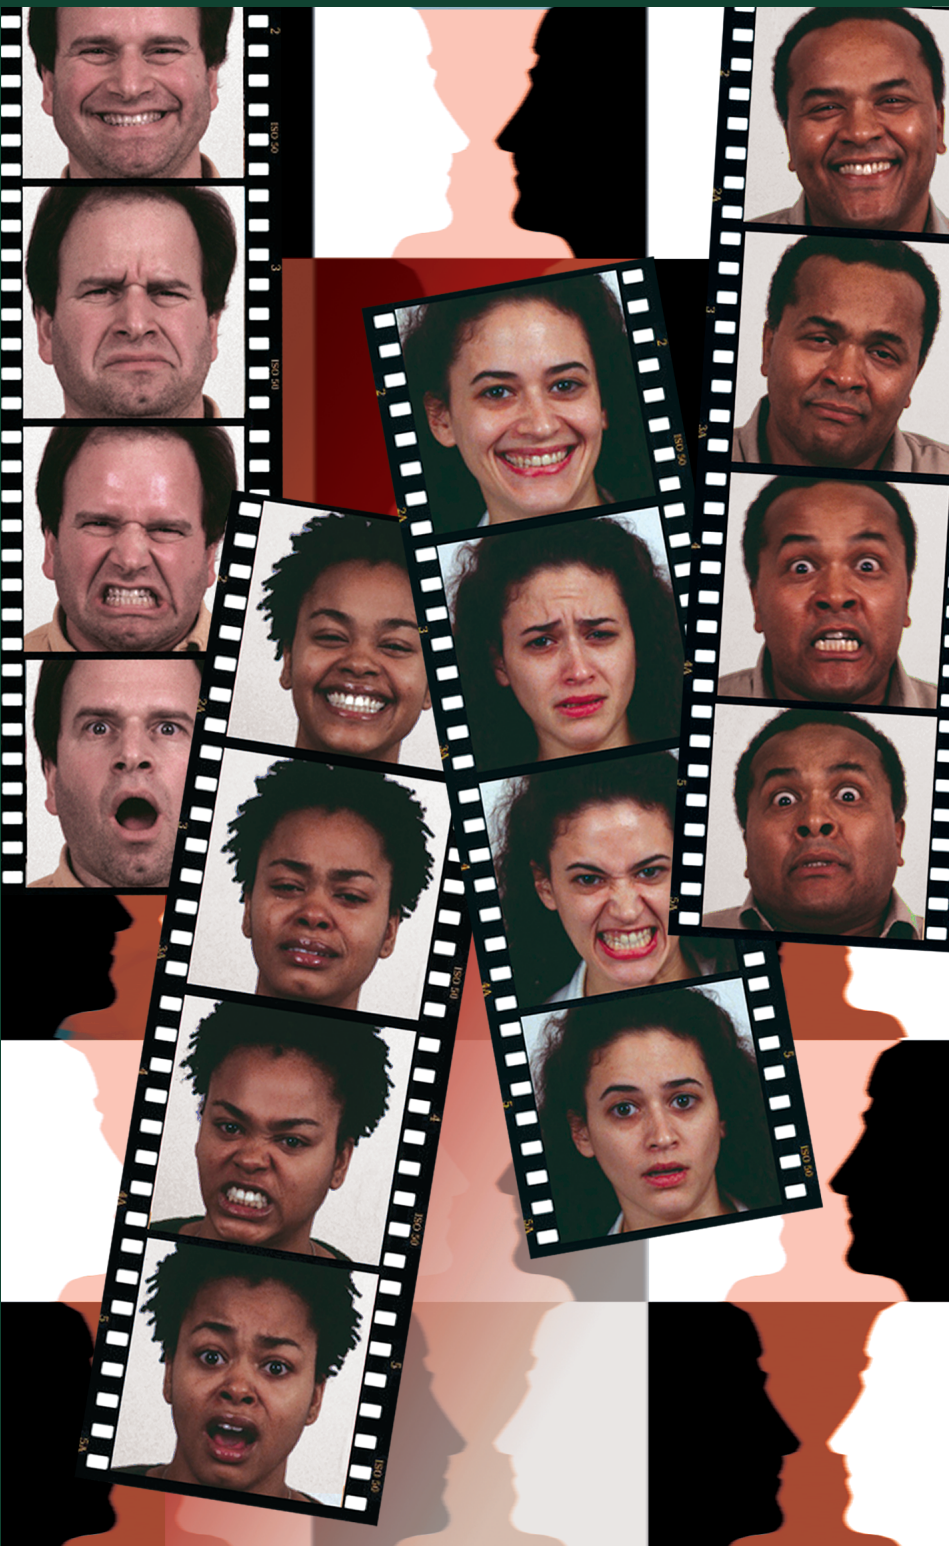

Cost-Effectiveness of Treatments for Adolescent Depression: Results From TADS  
Marisa Elena Domino et al. 588

Stimulant Therapy and Risk for Subsequent Substance Use Disorders in Male Adults With ADHD: A Naturalistic Controlled 10-Year Follow-Up Study  
Joseph Biederman et al. 597

Age of Methylphenidate Treatment Initiation in Children With ADHD and Later Substance Abuse: Prospective Follow-Up Into Adulthood  
Salvatore Mannuzza et al. 604

◀ The Other-Race Effect in Face Processing Among African American and Caucasian Individuals With Schizophrenia  
Amy E. Pinkham et al. 639

May 2008

Volume 165 • Number 5

Official Journal of the  
AMERICAN PSYCHIATRIC ASSOCIATION

[ajp.psychiatryonline.org](http://ajp.psychiatryonline.org)
