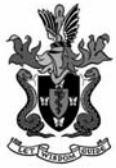

# THE BRITISH JOURNAL OF PSYCHIATRY

March 2008, VOL. 192

<http://bjp.rcpsych.org>

A8 Editorial Board

A10 Highlights of this issue

## Editorials

161 **CATIE and CUTLASS: can we handle the truth?**  
S. Lewis and J. Lieberman

164 **The long and the short of it: are shorter periods of hospitalisation beneficial?**  
D. Capdevielle and K. Ritchie

## Review article

166 **Childhood sexual abuse and non-suicidal self-injury: meta-analysis**  
E.D. Klonsky and A. Moyer

170 **Maudsley Hospital nightmares**  
From War Neurosis and Shell Shock by Frederick Mott

## Papers

171 **Public health significance of mixed anxiety and depression: beyond current classification**  
J. Das-Munshi, D. Goldberg, P.E. Bebbington, D.K. Bhugra, T.S. Brugha, M.E. Dewey, R. Jenkins, R. Stewart, and M. Prince

177 **War psychiatry - in 100 words**  
S. Wessely

178 **Self-harm in first-episode psychosis**  
S.B. Harvey, K. Dean, C. Morgan, E. Walsh, A. Demjaha, P. Dazzan, K. Morgan, T. Lloyd, P. Fearon, P.B. Jones, and R. M. Murray

185 **Perceptions of disadvantage, ethnicity and psychosis**  
C. Cooper, C. Morgan, M. Byrne, P. Dazzan, K. Morgan, G. Hutchinson, G.A. Doody, G. Harrison, J. Leff, P. Jones, K. Ismail, R. Murray, P.E. Bebbington, and P. Fearon

191 **Facial fear processing and psychotic symptoms in schizophrenia: functional magnetic resonance imaging study**  
P.G. Michalopoulou, S. Surguladze, L.A. Morley, V.P. Giampietro, R.M. Murray, and S.S. Shergill

196 **Erotic dreams in normal persons - 100 years ago**

H. Rollin

197 **Pilot investigation of the changes in cortical activation during facial affect recognition with lamotrigine monotherapy in bipolar disorder**

J. Jogia, M. Haldane, A. Cobb, V. Kumari, and S. Frangou

202 **Cognitive-behavioural intervention for self-harm: randomised controlled trial**

N. Slee, N. Garnefski, R. van der Leeden, E. Arensman, and P. Spinhoven

212 **Psychosocial intervention for war-affected children in Sierra Leone**

L. Gupta and C. Zimmer

217 **Cognitive-behavioural therapy v. mirtazapine for chronic fatigue and neurasthenia: randomised placebo-controlled trial**

B. Stubhaug, S.A. Lie, H. Ursin, and H.R. Eriksen

223 **Lunacy and exercising - psychiatry in pictures**

K. Sammet

224 **Predictors of employment for people with severe mental illness: results of an international six-centre randomised controlled trial**

J. Catty, P. Lissouba, S. White, T. Becker, R.E. Drake, A. Fioritti, M. Knapp, C. Lauber, W. Rössler, T. Tomov, J. van Busschbach, D. Wiersma and T. Burns, on behalf of the EQOLISE Group

## Columns

232 **Correspondence**

235 **Book reviews**

240 **Contents of Advances in Psychiatric Treatment**

241 **Contents of the American Journal of Psychiatry**

242 **From the Editor's desk**

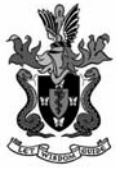

# THE BRITISH JOURNAL OF PSYCHIATRY

April 2008, VOL. 192

<http://bjp.rcpsych.org>

A12 Editorial Board

A14 Highlights of this issue

## Editorials

243 Models as a high-risk group: the health implications of a size zero culture

J.L. Treasure, E.R. Wack, and M.E. Roberts

## In debate

245 Specialised alcohol treatment services are a luxury the NHS cannot afford

J. Luty / T. Carnwath

## Review article

248 Longitudinal studies of cognition in schizophrenia: meta-analysis

A. Szöke, A. Trandafir, M.-E. Dupont, A. Méary, F. Schürhoff, and M. Leboyer

257 William Battie's Treatise on Madness and John Monro's Remarks on Dr Battie's Treatise—250 years ago

A. Morris

## Papers

258 Virtual reality study of paranoid thinking in the general population

D. Freeman, K. Pugh, A. Antley, M. Slater, P. Bebbington, M. Gittins, G. Dunn, E. Kuipers, D. Fowler, and P. Garety

264 Congenital anomalies and early functional impairments in a prospective birth cohort: risk of schizophrenia-spectrum disorder in adulthood

J.L. Waddington, A.S. Brown, A. Lane, C.A. Schaefer, R.R. Goetz, M. Bresnahan, and E.S. Susser

268 Predictive value of folate, vitamin B<sub>12</sub> and homocysteine levels in late-life depression

J.-M. Kim, R. Stewart, S.-W. Kim, S.-J. Yang, I.-S. Shin, and J.-S. Yoon

275 Attributional style and depression

H.A. Ball, P. McGuffin, and A.E. Farmer

279 Psychosocial and clinical correlates of suicidal acts: results from a national population survey

E. Robertson Blackmore, S. Munce, I. Weller, B. Zagorski, S.A. Stansfeld, D.E. Stewart, E.D. Caine, and Y. Conwell

284 Complaint—Poems by doctors

William Carlos Williams

285 Major depression, 5HTTLPR genotype, suicide and antidepressant influences on thalamic volume

K.A. Young, W.L. Bonkale, L.A. Holcomb, P.B. Hicks, and D.C. German

289 Psychosis: the price *Homo Sapiens* pays for language—in 100 words

T. Crow

290 Severity of depressive episodes during the course of depressive disorder

L.V. Kessing

294 Prognosis of adolescent partial syndromes of eating disorder

G.C. Patton, C. Coffey, J.B. Carlin, L. Sanci, and S. Sawyer

300 Integrated multidisciplinary diagnostic approach for dementia care: randomised controlled trial

C.A.G. Wolfs, A. Kessels, C.D. Dirksen, J.L. Severens, and F.R.J. Verhey

## Short reports

306 Effects of cannabidiol on schizophrenia-like symptoms in people who use cannabis

C.J.A. Morgan and H.V. Curran

308 Anxiety disorders in mothers and their children: prospective longitudinal community study

A. Schreier, H.-U. Wittchen, M. Höfler, and R. Lieb

310 Prevalence and correlates of non-fatal suicidal behaviour among South Africans

S. Joe, D.J. Stein, S. Seedat, A. Herman, and D.R. Williams

## Columns

312 Correspondence

316 Book reviews

318 Contents of *Advances in Psychiatric Treatment*

319 Contents of the *American Journal of Psychiatry*

320 From the Editor's desk

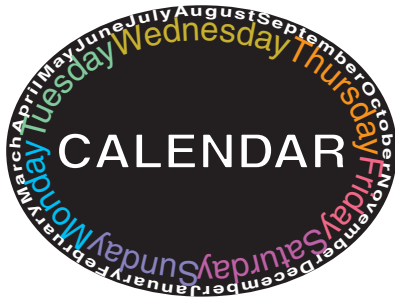

For free listing of your organization's official annual or regional meeting, please send us the following information: sponsor, location, inclusive dates, type and number of continuing education credits (if available), and the name, address, and telephone number of the person or group to contact for more information. In order for an event to appear in our listing, all notices and changes must be received at least 6 months in advance of the meeting and should be addressed to:

Calendar, American Journal of Psychiatry, 1000 Wilson Boulevard, Suite 1825, Arlington, VA 22209-3901, [jblair@psych.org](mailto:jblair@psych.org) (e-mail).

Because of space limitations, only listings of meetings of the greatest interest to Journal readers will be included.

## MAY

**May 1–4**, The 52nd Annual Meeting of the American Academy of Psychoanalysis and Dynamic Psychiatry, Washington, DC. Contact: Executive Office, American Academy of Psychoanalysis and Dynamic Psychiatry, P. O. Box 30, Bloomfield, CT 06002; (888) 691-8281 (tel), (860) 286-0787 (fax), [info@aapdp.org](mailto:info@aapdp.org) (e-mail) [www.aapdp.org](http://www.aapdp.org) (web site).

**May 3–4**, American Academy of Psychiatry and the Law Semiannual Meeting, Washington, D.C. Contact: One ReGENCY Drive, PO Box 30, Bloomfield, CT 06002-0030; (800) 331-1389, (tel) (860) 286-0787 (fax), [execoff@aaapl.org](mailto:execoff@aaapl.org) (e-mail).

**May 3–8**, 161st Annual Meeting of the American Psychiatric Association, Washington, DC. Contact: Cathy Nash, APA Annual Meetings Dept., 1000 Wilson Blvd., Ste. 1825, Arlington, VA 22209; (703) 907-7822.

**May 11–14**, World Psychiatric Association Epidemiology & Public Health Section Meeting, Saskatoon, Saskatchewan. Contact: Karen E. Mosier, Saskatchewan Health Organization for Research and Evaluation (SHORE), Department of Psychiatry, Ellis Hall, Room 110; (306) 966-1840 (tel), (306) 966-8761 (fax), [karen.mosier@usask.ca](mailto:karen.mosier@usask.ca) (e-mail), <http://www.medicine.usask.ca/psychiatry/wpa2008/>.

**May 29–31**, International Congress of Dual Pathology 2008, Madrid. Contact: Technical Secretariat, Tilesa OPC, Londres, 17 - 28028, Madrid, Spain; (34) 91 361 12600 (tel), (34) 91 355 9208, [secretariat@cipd2008.com](mailto:secretariat@cipd2008.com) (e-mail), [www.cipd2008.com](http://www.cipd2008.com) (web site).

## JUNE

**June 18–22**, American Psychoanalytic Association 97th Annual Meeting, Atlanta, GA. Contact: Dottie Jeffries, Director of Public Affairs, (212) 752-0450 x29 (tel), [djeffries@apsa.org](mailto:djeffries@apsa.org) (e-mail).

**June 19–22**, Annual Meeting of the Society for the Study of Psychiatry and Culture, "The Cultural Formulation and Cultural/Gender Issues in DSM-V," San Francisco, CA. Contact: Jim Boehnlein, M.D., Oregon Health and Science University, (505) 494-6653 (tel), [sspcadmin@gmail.com](mailto:sspcadmin@gmail.com) (e-mail) or Francis Lu, M.D. [francis.lu@sfgf.org](mailto:francis.lu@sfgf.org) (e-mail)

**June 19–21**, Thematic Conference on Depression and Relevant Psychiatric Condition in Primary Care, Granada, Spain. Contact: Francisco Torres-González, Andalusian Research Group on Mental Health, University of Granada, Avenida de Madrid 11, Granada 18071, Spain; (34) 958-272651 (tel), (34) 958-275214 (fax), [ftorres@ugr.es](mailto:ftorres@ugr.es) (e-mail).

**June 21–25**, 1st Schizophrenia International Research Society Conference, Venice, Italy. Contact: Schizophrenia International Research Society, [schizophreniasoc@aol.com](mailto:schizophreniasoc@aol.com) (e-mail), [www.schizophreniaconference.org](http://www.schizophreniaconference.org) (web site).

## SEPTEMBER

**September 4–7**, Canadian Psychiatric Association 58th Annual Meeting, Vancouver, British Columbia, Canada. Contact: 260-441 MacLaren Street, Ottawa, ON K2P 2H3, Canada; (800) 267-1555 (tel), (613) 234-9857 (fax), [cpa@medical.org](mailto:cpa@medical.org) (e-mail).

## OCTOBER

**October 2–5**, 60th Institute on Psychiatric Services, American Psychiatric Association, Chicago, IL. Contact: Jill Gruber, APA Annual Meetings Dept., 1000 Wilson Blvd., Ste. 1825, Arlington, VA 22209; (703) 907-7815.

**October 17–19**, 3rd International Conference on Schizophrenia (IconS III), Chennai, India. Contact: Schizophrenia Research Foundation (SCARF), [scarf@vsnl.com](mailto:scarf@vsnl.com) (e-mail), [www.iconscarf.org](http://www.iconscarf.org) (web site).

**October 28–November 2**, 55th Annual Meeting of the American Academy of Child and Adolescent Psychiatry, Chicago. Contact: AACAP, 3615 Wisconsin Avenue, N.W., Washington, DC 20016-3007; (202) 966-7300 (tel), (202) 966-2891 (fax), [meetings@aacap.org](mailto:meetings@aacap.org) (e-mail), [www.aacap.org](http://www.aacap.org) (web site).

## NOVEMBER

**November 14–17**, Annual Conference of the International Society for the Study of Trauma and Dissociation, Chicago. Contact: Heidi Walker, Executive Director; [hwalker@amg-inc.com](mailto:hwalker@amg-inc.com) (e-mail), [isst-d.org](http://isst-d.org) (web site).

## FEBRUARY 2009

**February 18–22**, Annual Meeting of the American Neuropsychiatric Association (ANPA), San Antonio, TX. Contact: ANPA office; (614) 447-2077 (tel), (614) 263-4366 (fax), [anpa@osu.edu](mailto:anpa@osu.edu) (e-mail), [www.anpaonline.org](http://www.anpaonline.org) (web site).

Continued on page A60

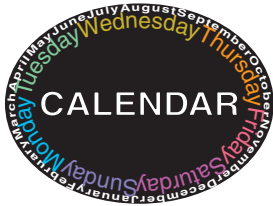

Continued from page A54

**February 25–March 1**, American College of Psychiatrists Annual Meeting, Tucson, AZ. Contact: 122 South Michigan Avenue, Suite 1360, Chicago, IL 60603; (312) 662-1020 (tel), (312) 662-1025 (fax), angel@ACPsych.org (e-mail).

## MARCH

**March 5–8**, 22nd Annual Meeting of the American Association for Geriatric Psychiatry, Honolulu. Contact: AAGP, 7910 Woodmont Ave., Ste. 1050, Bethesda, MD 20814-3004; (301) 654-7850 (tel), (301) 654-4137 (fax), www.aagpmeeting.org (web site).

**March 27–29**, 3rd International Conference of The International Society of Interpersonal Psychotherapy (ISIPT), New York City, NY. Contact: 2009 ISIPT Planning Committee; hv2009@columbia.edu (e-mail).

## APRIL

**April 22–26**, Annual Meeting and Scientific Sessions of the Society of Behavioral Medicine, Montreal, Quebec. Contact: Society of Behavioral Medicine, (414) 918-3156 (tel), (414) 276-3349 (fax), info@sbm.org (e-mail).

### Continuing Medical Education

Three articles in each issue provide an opportunity to earn up to 1 hour category 1 **CME** credit each by taking a course covering the content. Credit available online only with purchased subscription to AJP's CME program. Visit [cme.psychiatryonline.org](http://cme.psychiatryonline.org) for details.

### FREE AUDIO! Have You Heard?

You can listen to highlights of *The American Journal of Psychiatry* by downloading a monthly free .mp3 audio file from our website (<http://ajp.psychiatryonline.org/misc/audio.dtl>) or by subscribing to the AJP Audio podcast at iTunes or other feed reader.

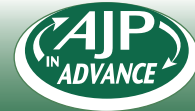

### GET AHEAD!

Subscribers can now view PDFs of all new research articles before print publication by clicking on the "AJP in Advance" logo at the AJP website ([ajp.psychiatryonline.org](http://ajp.psychiatryonline.org)).

## Coming in the June 2008 issue\*

### THE AMERICAN JOURNAL OF PSYCHIATRY

#### *Individual and Societal Effects of Mental Disorders on Earnings in the United States: Results From the National Comorbidity Survey Replication*

R. Kessler, S. Heeringa, M. Lakoma, M. Petukhova, A. Rupp, M. Schoenbaum, P.S. Wang, and A. Zaslavsky

#### *Reduced Amygdala Response to Fearful Expressions in Children and Adolescents With Callous-Unemotional Traits and Disruptive Behavior Disorders*

A. Marsh, E. Finger, D. Mitchell, M. Reid, C. Sims, D. Kosson, K. Towbin, E. Leibenluft, D. Pine, and R. Blair

#### *Atomoxetine and Osmotically Released Methylphenidate For the Treatment of Attention Deficit Hyperactivity Disorder: Acute Comparison and Differential Response*

J. Newcorn, C. Kratochvil, A. Allen, C. Casat, D. Ruff, R. Moore, and D. Michelson

#### *Toxic Effects of Depression on Brain Function: Impairment of Delayed Recall and the Cumulative Length of Depressive Disorder in a Large Sample of Depressed Outpatients*

P. Gorwood, E. Corruble, B. Falissard, and G. Goodwin

\*Can't wait? Visit [ajp.psychiatryonline.org](http://ajp.psychiatryonline.org) and click the "AJP in Advance" logo to see all articles uploaded in advance of print!
